# Supplementary material for: Solvothermally Grown Oriented WO3 Nanoflakes for the Photocatalytic Degradation of Pharmaceuticals in a Flow Reactor
Source: MDPI journal article supplement (doi:10.3390/nano14100860), 2024-05-15
Supplement: s1 [file s1]

## Supplementary Material

# Solvothermally Grown Oriented WO<sub>3</sub> Thin-film for the Photocatalytic Degradation of Pharmaceuticals in a Flow Reactor

Mirco Cescon <sup>1</sup>, Claudia Stevanin <sup>2</sup>, Matteo Ardit <sup>3,5</sup>, Michele Orlandi <sup>4</sup>, Annalisa Martucci <sup>3</sup>, Tatiana Chenet <sup>2</sup>, Luisa Pasti <sup>2,\*</sup>, Stefano Caramori <sup>1a,\*</sup>, Vito Cristino <sup>1</sup>

<sup>1</sup> Department of Chemical, Pharmaceutical and Agricultural Sciences, University of Ferrara, Via L. Borsari 46, Ferrara, 44121, Italy

<sup>a</sup> National Interuniversity Consortium of Materials Science and Technology (INSTM), University of Ferrara Research Unit, 44121 Ferrara, Italy

<sup>2</sup> Department of Environmental and Prevention Sciences, University of Ferrara, Via L. Borsari 46, Ferrara, 44121, Italy

<sup>3</sup> Department of Physics and Earth Sciences, University of Ferrara, Via Saragat 1, Ferrara, 44121, Italy

<sup>4</sup> Department of Physics, University of Trento, Via Sommarive 14, Trento, 38123, Italy

<sup>5</sup> Department of Geosciences, University of Padova, Via Gradenigo 6, IT-35131 Padova

\* Correspondence: LP: [luisa.pasti@unife.it](mailto:luisa.pasti@unife.it); Tel.: +390532455346, SC: [stefano.caramori@unife.it](mailto:stefano.caramori@unife.it); Tel.: +390532455474

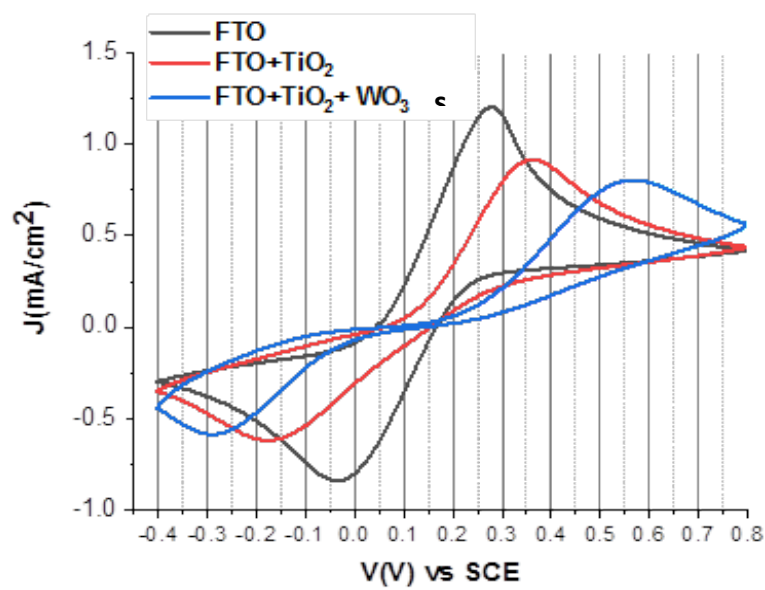

**Figure S1.** Cyclic voltammetry of FTO, FTO-TiO<sub>x</sub> and FTO-TiO<sub>x</sub>-WO<sub>3</sub> seed layer in 0.01 M K<sub>4</sub>FeCN<sub>6</sub> and 0.1 M LiClO<sub>4</sub>.

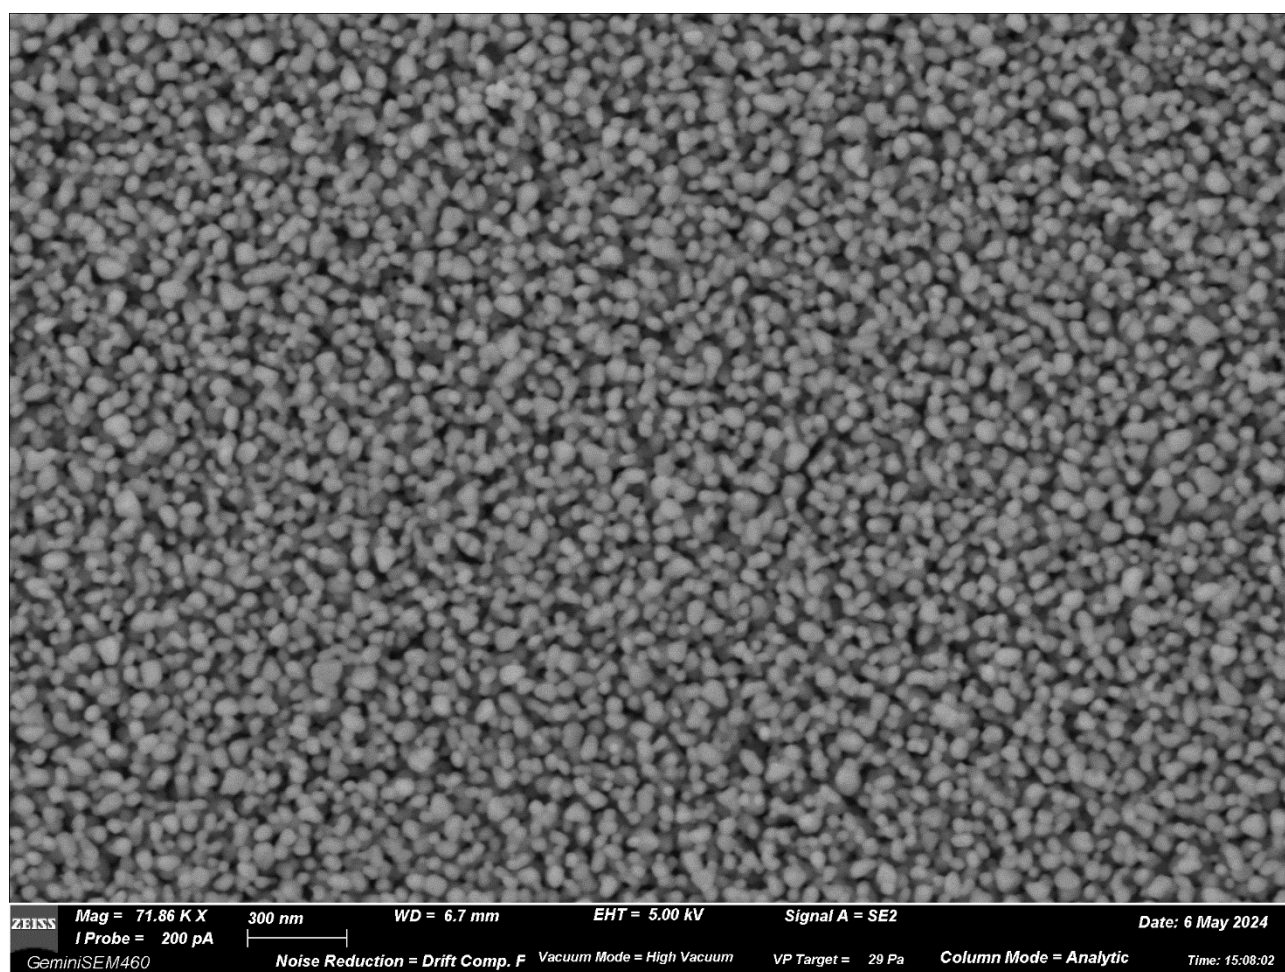

**Figure S2.** SEM image of WO<sub>3</sub>/coll.

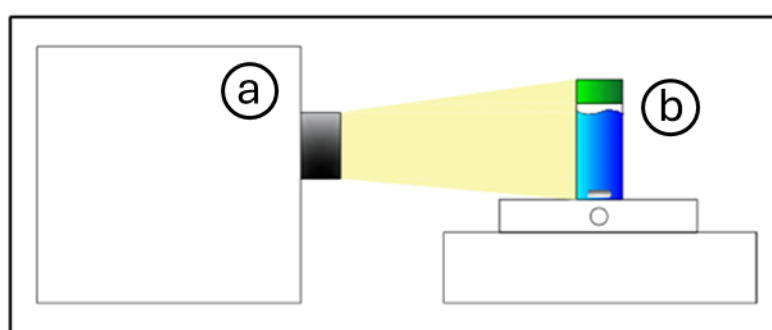

**Figure S3.** (a) Solar Simulator equipped with a AM1.5G filter and 380nm UV cut-off filter, (b) 4 µg/ml drug solution in vial under magnetic stirring.

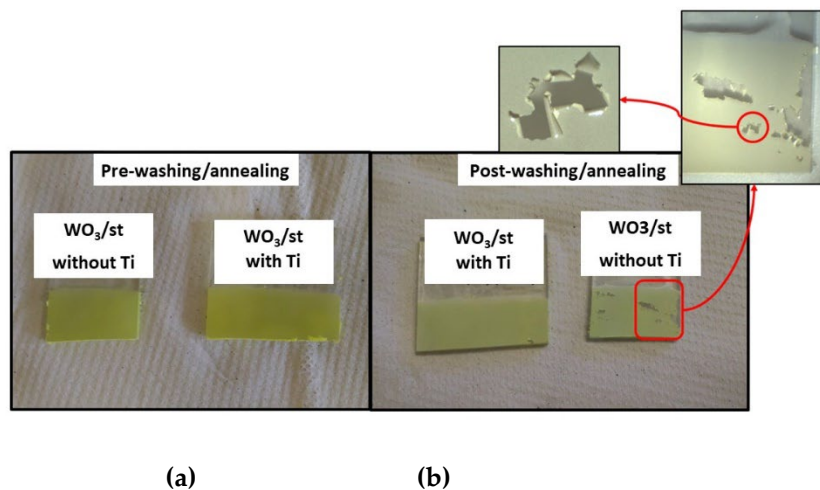

**Figure S4.** WO<sub>3</sub> films solvothermally grown on FTO before (a) and after (b) the annealing process. Electrodes equipped with the TiO<sub>x</sub> adhesion layer are indicated by (Ti) (i.e., WO<sub>3</sub>/st-Ti-FTO).

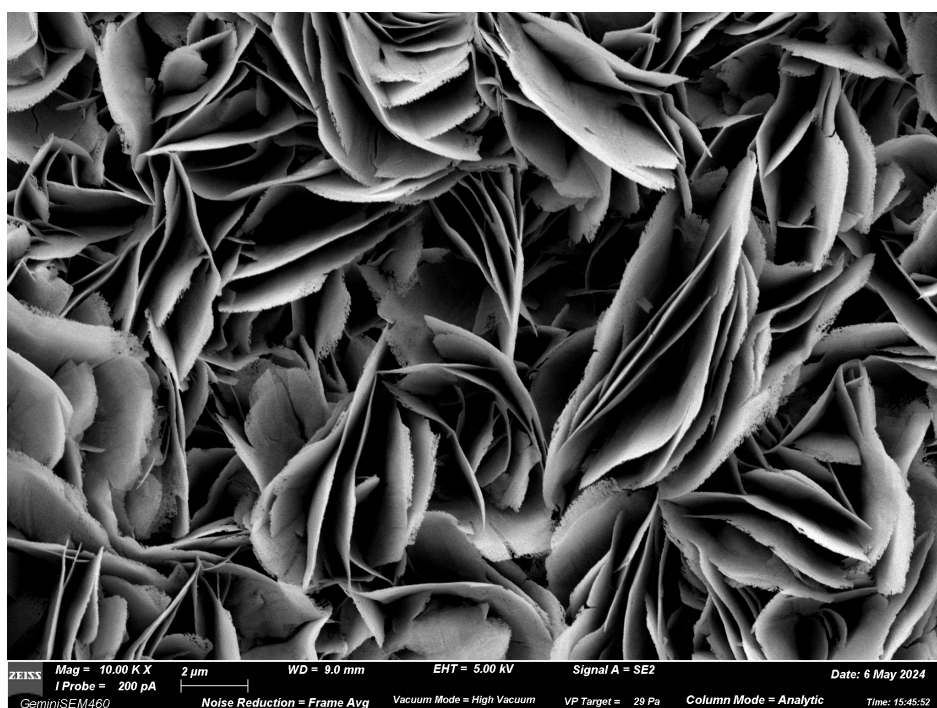

**Figure S5.** SEM image of WO<sub>3</sub>/st.

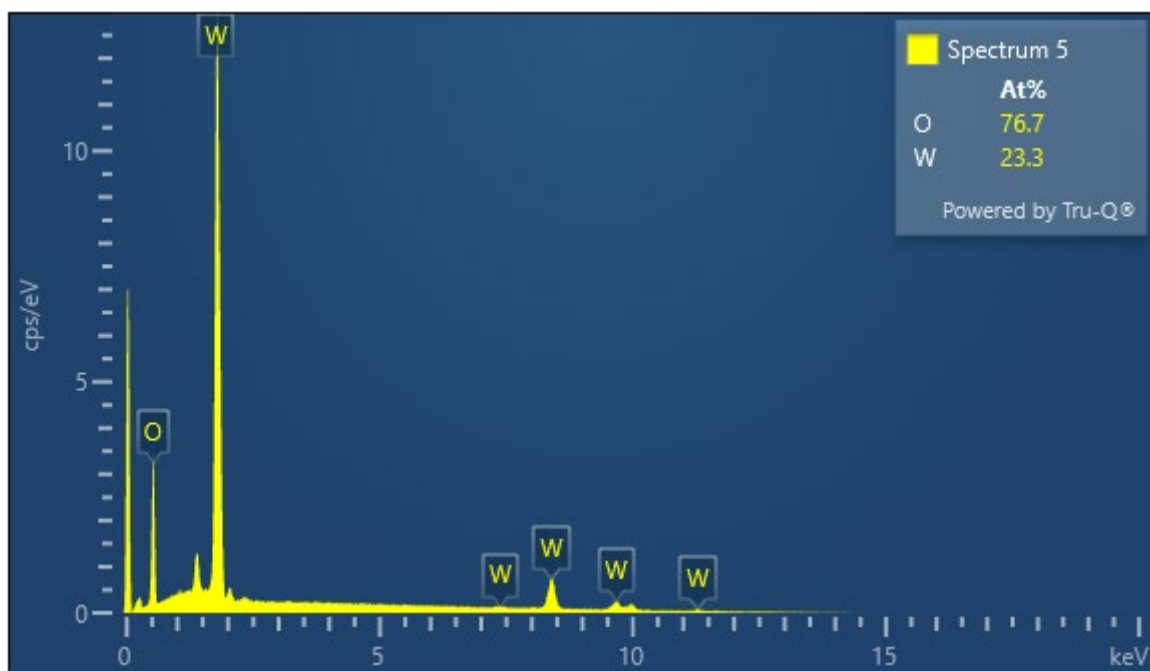

**Figure S6.** EDS spectra of  $\text{WO}_3/\text{st}$ .

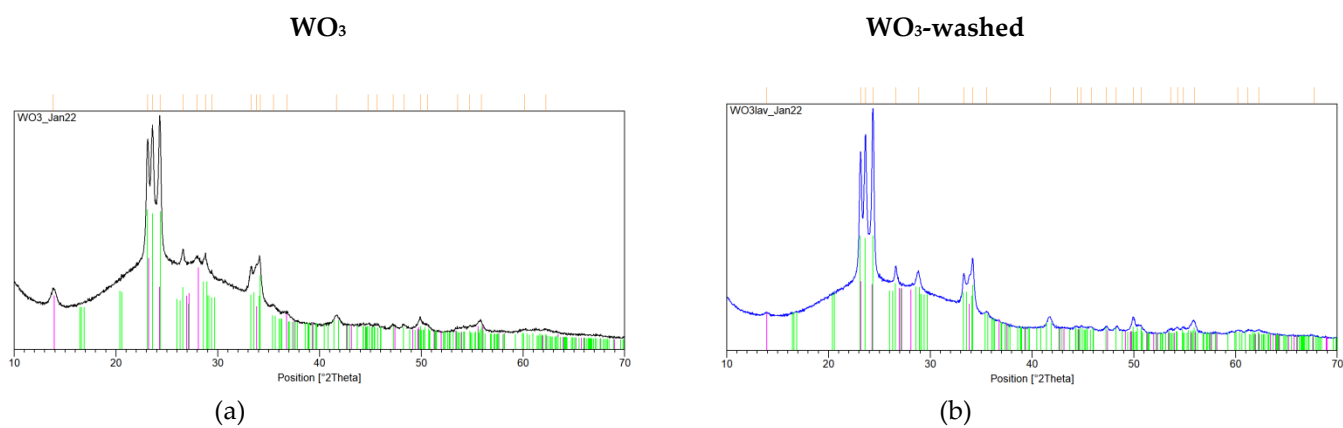

**Figure S7.** Phase identification for  $\text{WO}_3$  specimens grown on a microscope slide surface. The powder of both samples is mainly composed by  $\text{WO}_3$  in its monoclinic form ( $P2_1/n$ ; green reflections).  $\text{WO}_3$  in the hexagonal form ( $P6_3/mcm$ ; purple reflections) is also detected as associated minor phase.

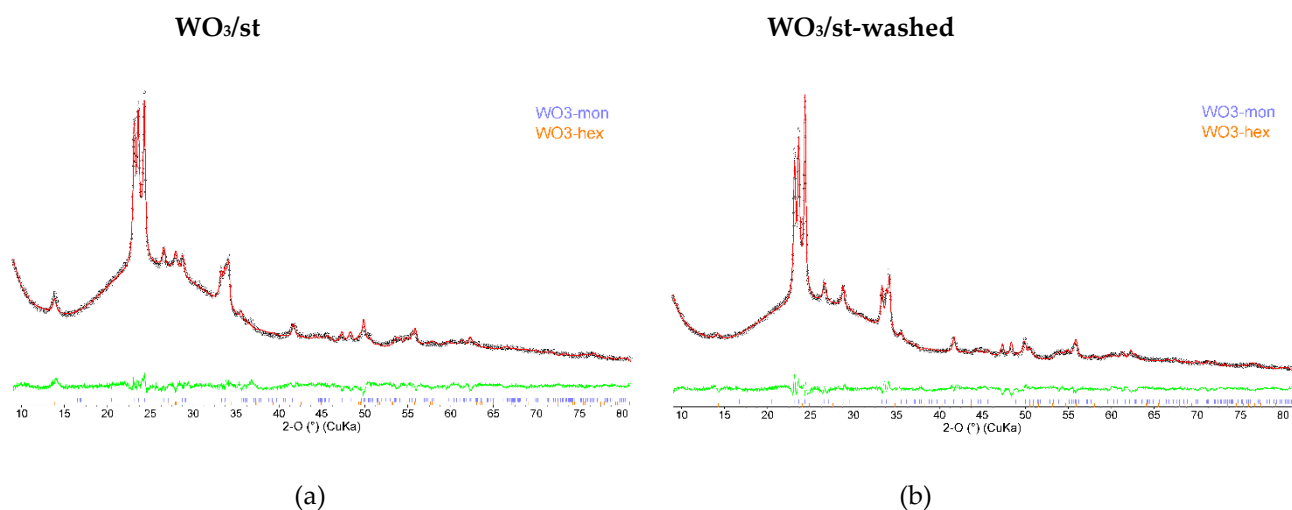

**Figure S8.** Rietveld refinement plots of the powder diffraction pattern for the  $\text{WO}_3/\text{st}$  specimens growth on the microscope slide surface. The experimental profile is represented by black dots and the best-fit refinement profile is the flow red line. The lower green curve is the weighted difference between observed and calculated patterns. Vertical ticks mark the position of reflections for the identified phases in the two specimens.

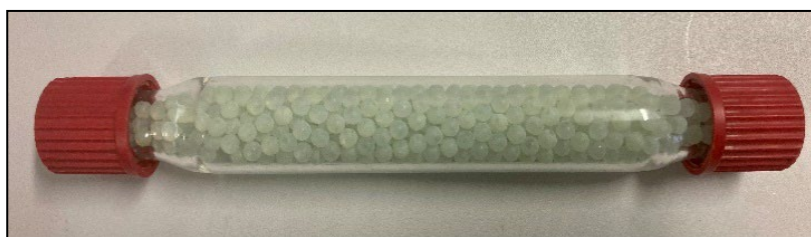

**Figure S9.** Glass column filled with  $\text{WO}_3/\text{st-GS}$ .

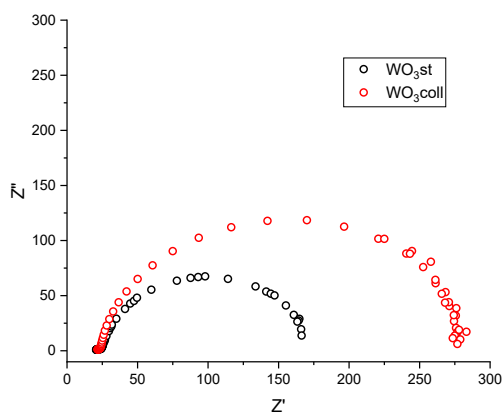

**Figure S10.** Nyquist plots of WO<sub>3</sub>/coll (red) and WO<sub>3</sub>/st (black) photoelectrode recorded at 0.6V vs SCE in 0.7M Na<sub>2</sub>SO<sub>4</sub> under AM1.5G illumination. 10 mV sinusoidal perturbation in the range 20000-0.1 Hz.

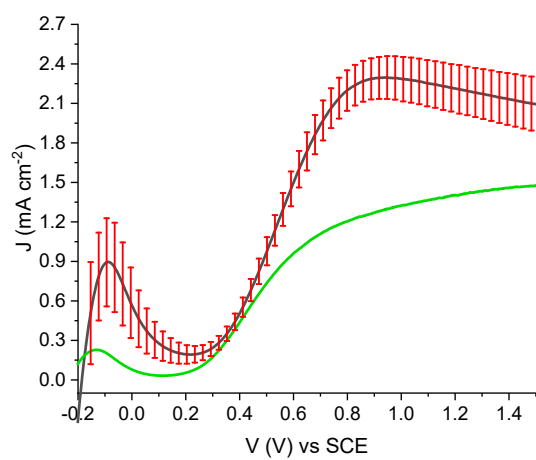

**Figure S11.** Average JV performance of a batch of WO<sub>3</sub>/st photoanodes (black line) compared to some of our best internal standards WO<sub>3</sub>/coll (green line). 0.7M Na<sub>2</sub>SO<sub>4</sub> under AM1.5G illumination.



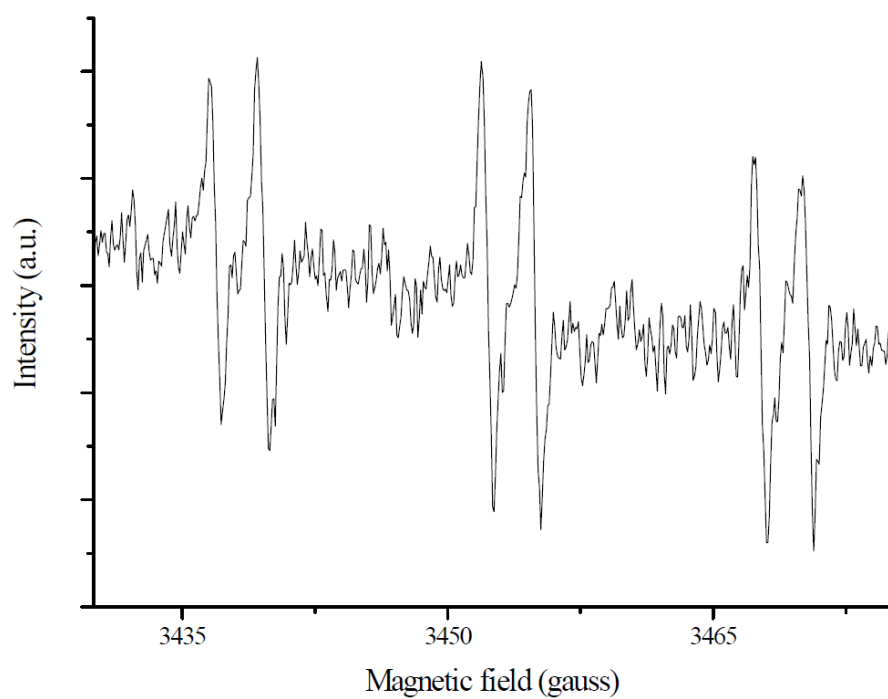

**Figure S12.** EPR spectrum obtained after few seconds photoirradiation ( $\lambda > 420$  nm) of aqueous suspension of  $\text{WO}_3$  containing  $\text{H}_2\text{SO}_4$  (0.1 M) and pbn ( $5 \times 10^{-2}$  M).

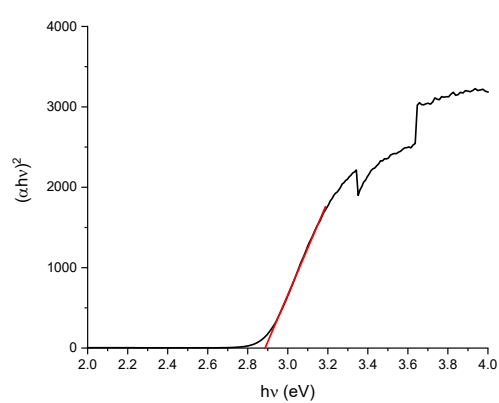

(A)

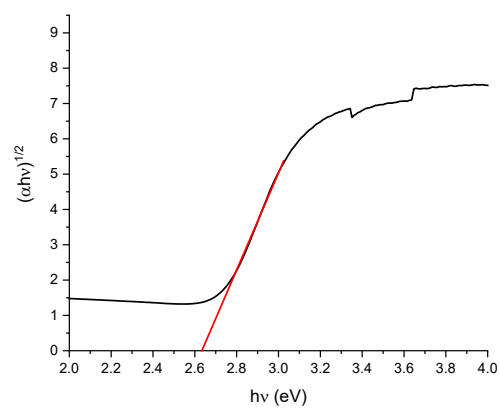

(B)



**Figure S13.** Tauc Plots of WO<sub>3</sub>/st according to the direct (A) and indirect (B) transitions.

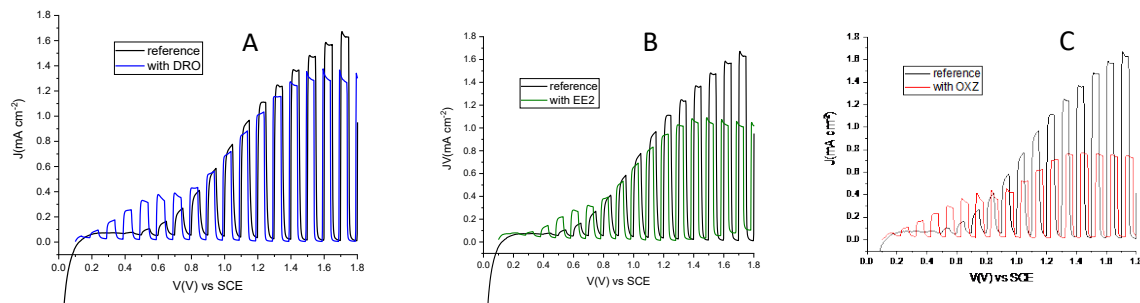

**Figure S14.** J/V chopped curves under AM 1.5G illumination of WO<sub>3</sub> in 0.1M of LiClO<sub>4</sub> in ACN solution in presence of 0.1M of DRO (A) 0.1M of EE2 (B) and 0.1M of OZ (C).

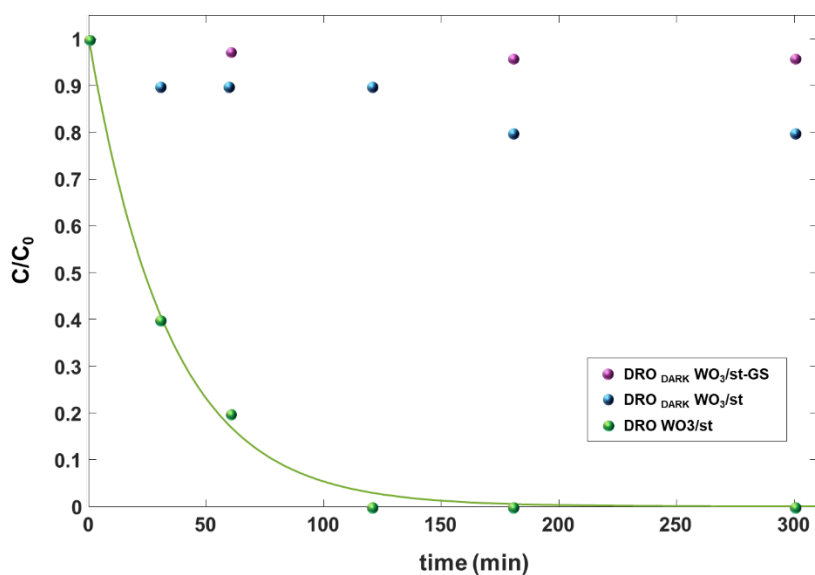

**Figure S15.** Comparison test (in presence of WO<sub>3</sub>): DRO in dark (DRO<sub>DARK</sub> WO<sub>3</sub>/st), DRO irradiated (DRO WO<sub>3</sub>/st) and DRO in dark in batch system with spheres coated with WO<sub>3</sub> (DRO<sub>DARK</sub> WO<sub>3</sub>/st-GS).

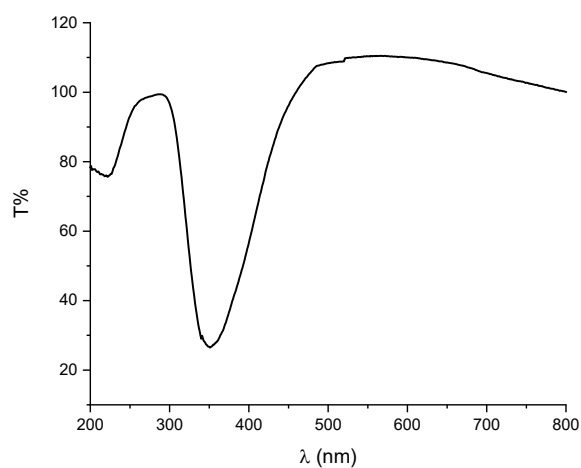

**Figure S16.** Transmission spectrum of  $\text{WO}_3/\text{st}$  loaded on glass spheres ( $[\text{T \% } (\text{WO}_3/\text{st-GS}) - \text{T \% GS}]$ ) obtained with an integrating sphere in diffuse reflection mode along an optical path of 1 cm.

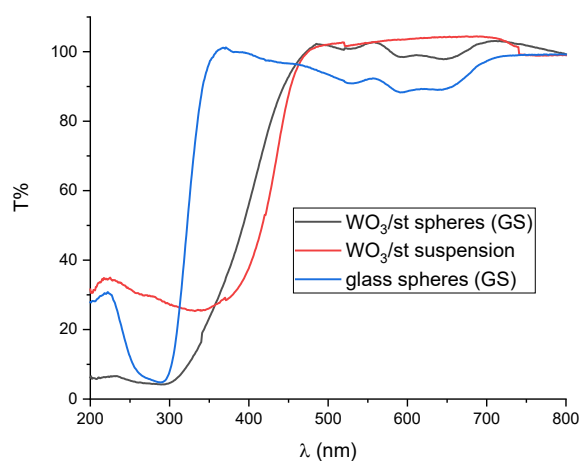

**Figure S17.** Transmission spectra (1 cm optical path) of naked glass spheres GS,  $\text{WO}_3$  coated glass spheres ( $\text{WO}_3/\text{st-GS}$ ) and  $\text{WO}_3\text{st}$  suspension (3.5 mg/ml) obtained in diffuse reflection mode.

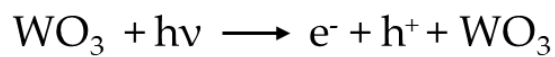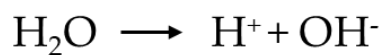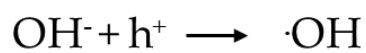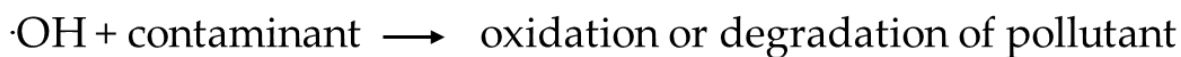

**Scheme S1.** Scheme for degradation of pollutants by WO<sub>3</sub>.

**Table S1.** EE2 degradation intermediates, retention times, fragment ions and proposed structures.

| <i>Precursor Ion (m/z)</i> | <i>t<sub>r</sub> (min)</i> | <i>MS<sup>2</sup> (m/z)</i> | <i>Structure</i>                                                                     |
|----------------------------|----------------------------|-----------------------------|--------------------------------------------------------------------------------------|
| 148.9                      | 6.52                       | 133.9                       | 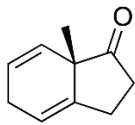  |
| 249.1                      | 9.56                       | 231.1, 138.1                |   |
| 267.5                      | 12.07                      | 220.5, 252.5                |  |
| 313.5                      | 14.10                      | 288.5, 295.5                |  |

**Table S2.** DRO degradation intermediates, retention times, fragment ions and proposed structures.

| <i>Precursor Ion (m/z)</i> | <i>t<sub>r</sub> (min)</i> | <i>MS<sup>2</sup> (m/z)</i> | <i>Structure</i>                                                                    |
|----------------------------|----------------------------|-----------------------------|-------------------------------------------------------------------------------------|
| 341.0                      | 7.02                       | 192.0; 149                  | 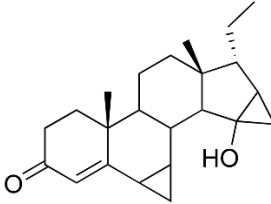  |
| 343.0                      | 7.53                       | 195.0; 151                  |   |
| 383.0                      | 13.06                      | 310; 190                    |  |

**Table S3.** OZ degradation intermediates, retention times, fragment ions and proposed structures.

| Precursor Ion (m/z) | <i>t<sub>r</sub></i> (min) | MS <sup>2</sup> (m/z) | Structure                                                                           |
|---------------------|----------------------------|-----------------------|-------------------------------------------------------------------------------------|
| 209.0               | 5.23                       | 192.0; 130.0          | 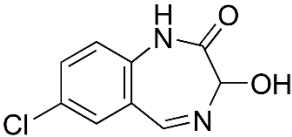  |
| 225.0               | 6.01                       | 208.0; 147.0          |   |
| 302.0               | 7.29                       | 287.0; 226.0; 192.0   |  |
